# Supplementary material
Source: publisher figshare collection journal article supplement (https://gsapubs.figshare.com/articles/dataset/_/12542402)

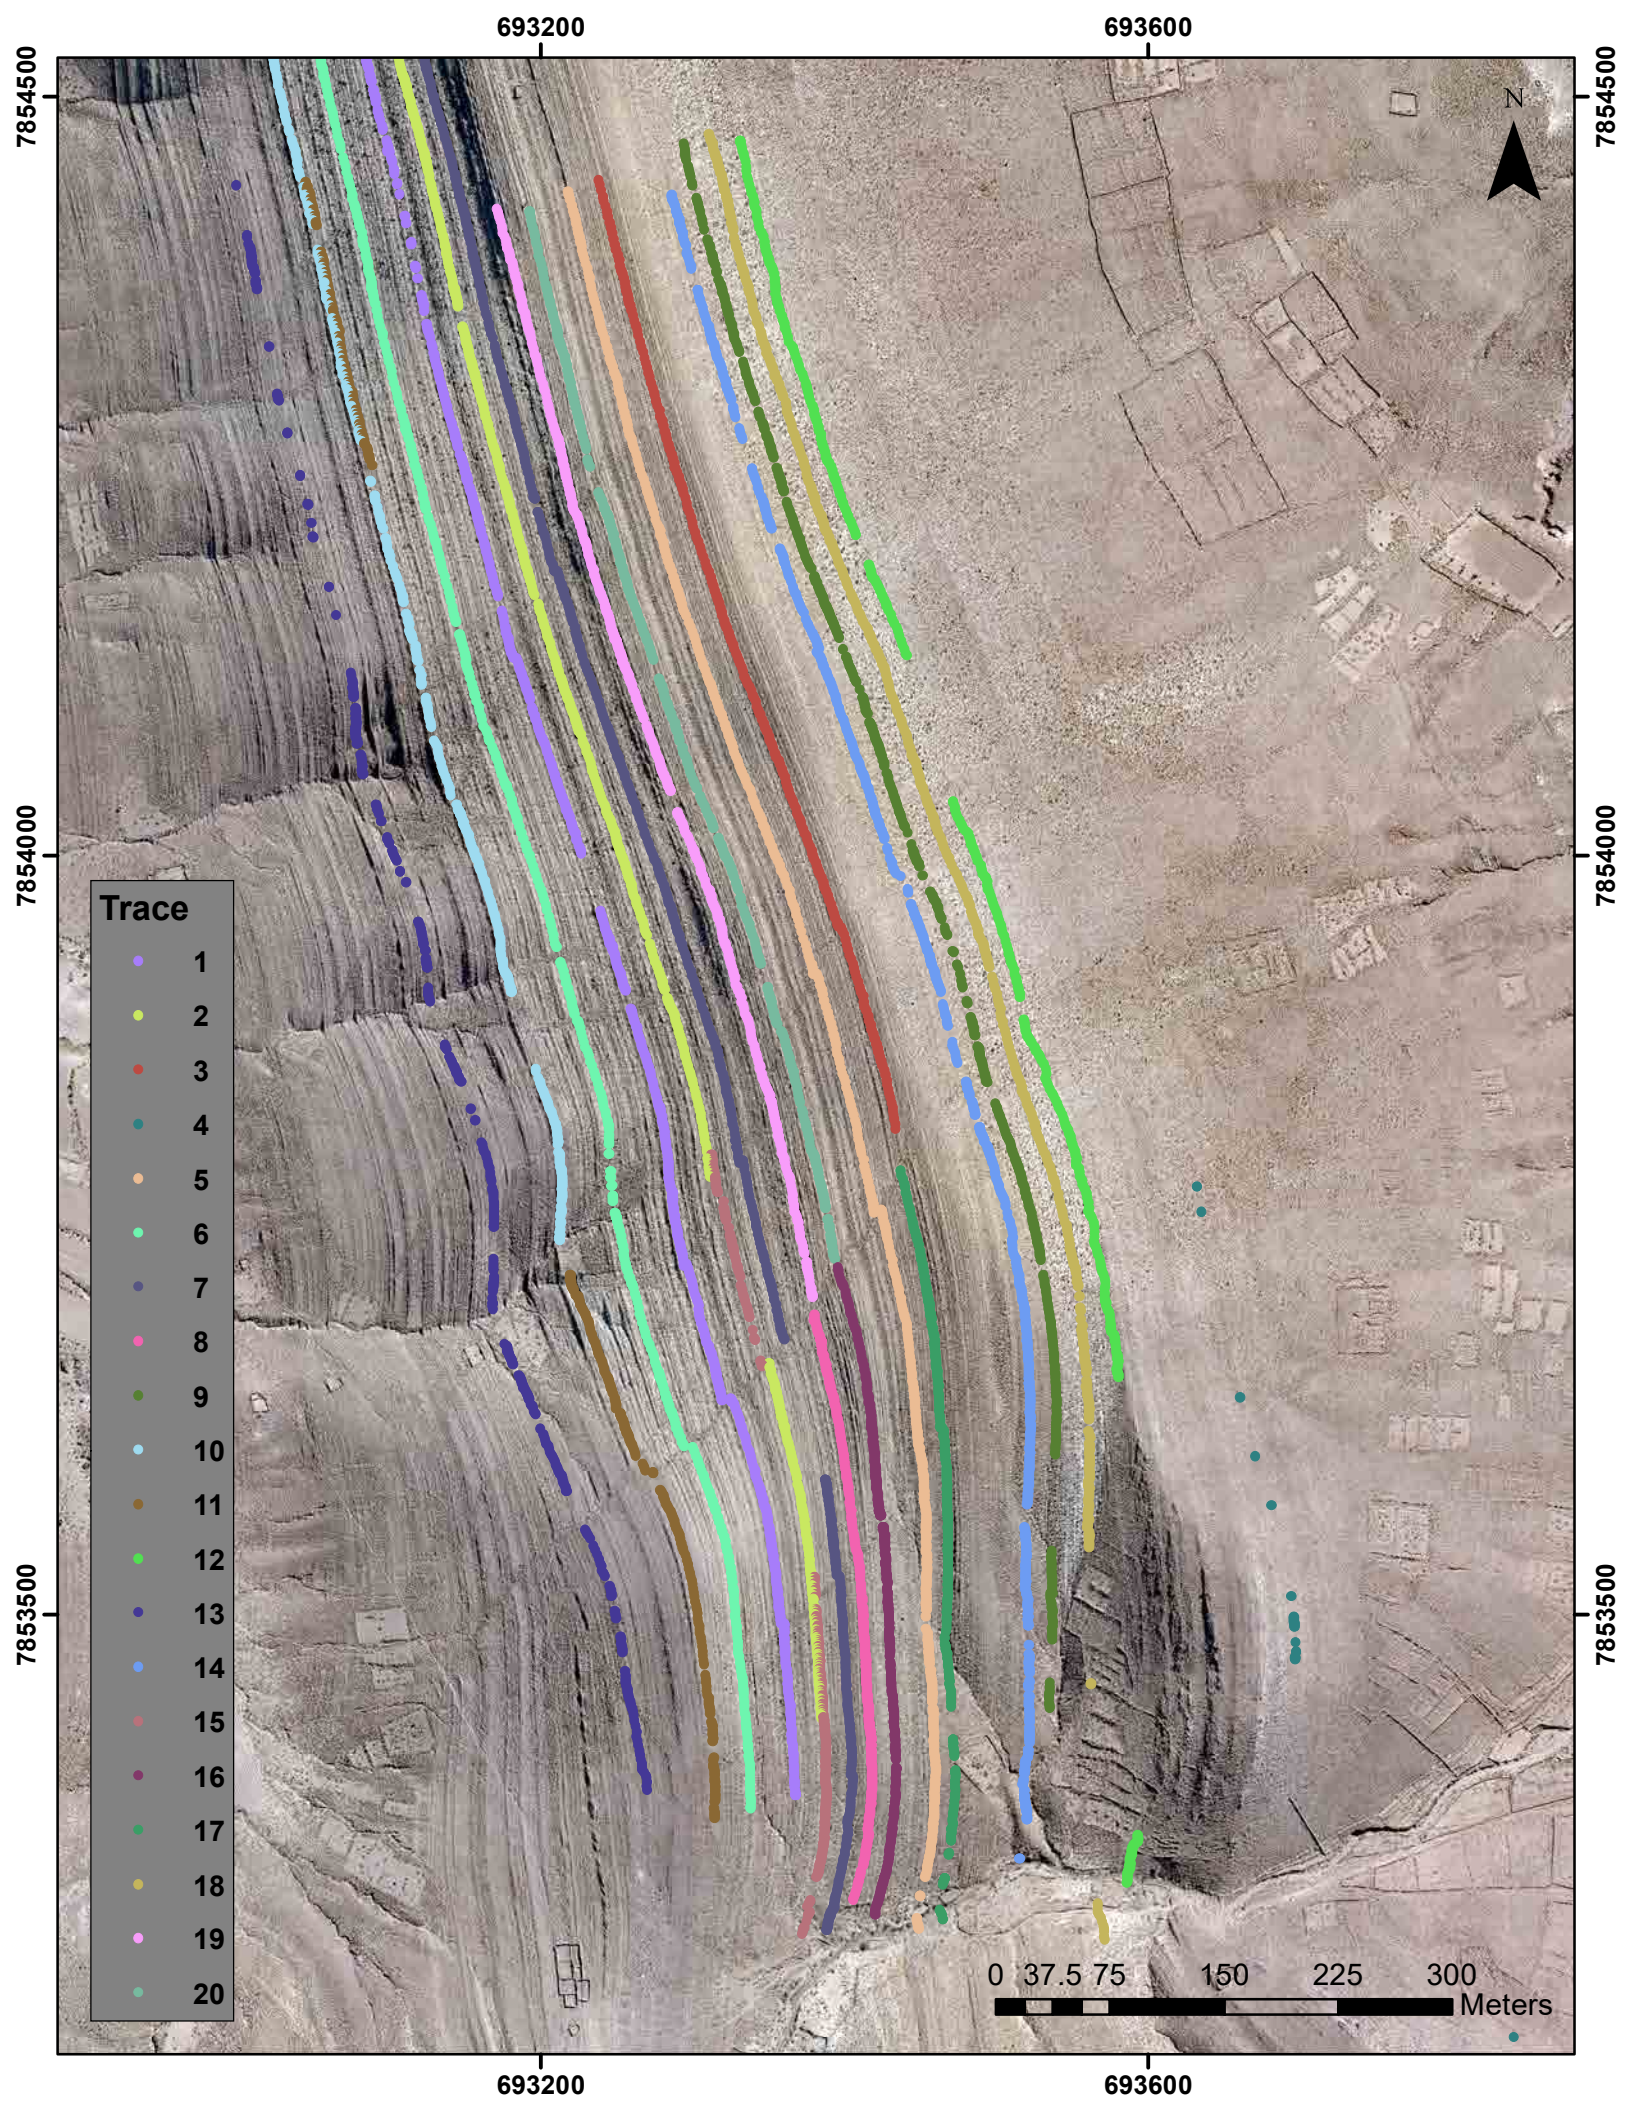

trace 1, range 450, sill 2e-03

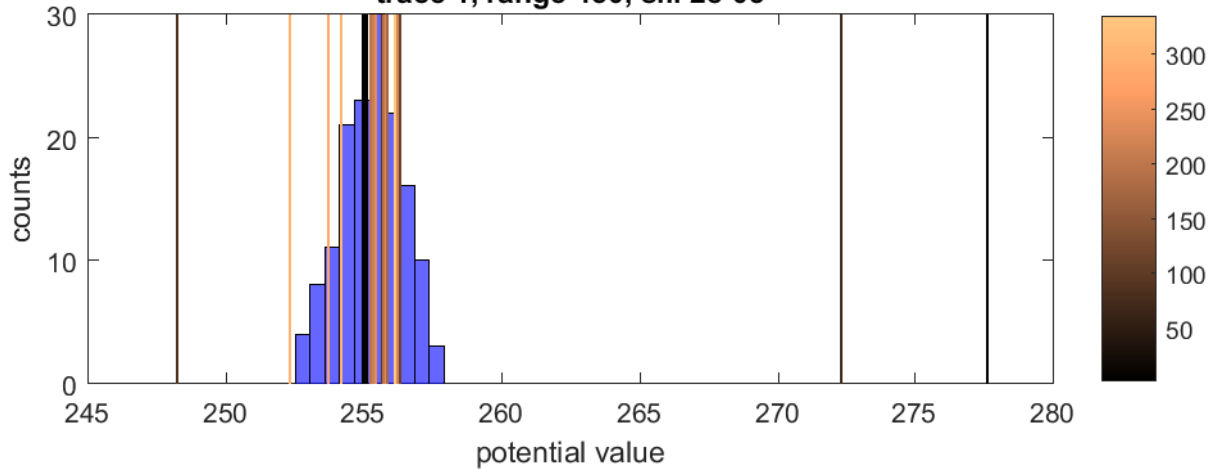

trace 2, range 450, sill 2e-03

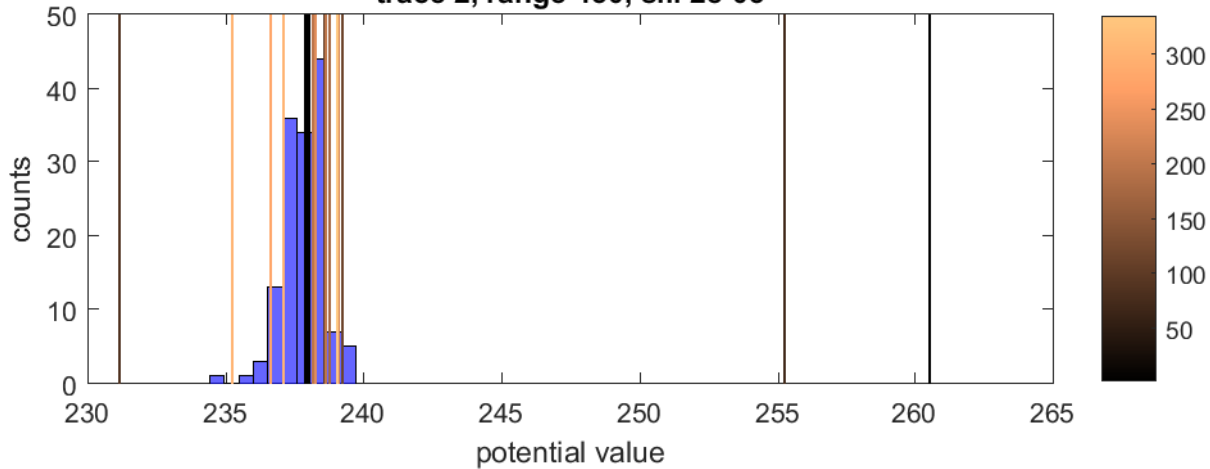

trace 3, range 450, sill 2e-03

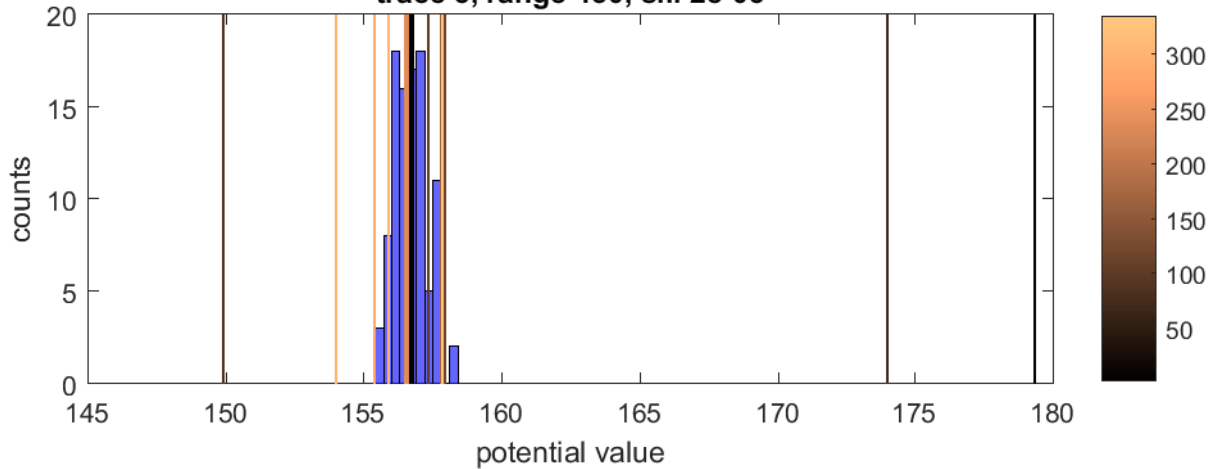

trace 4, range 450, sill 2e-03

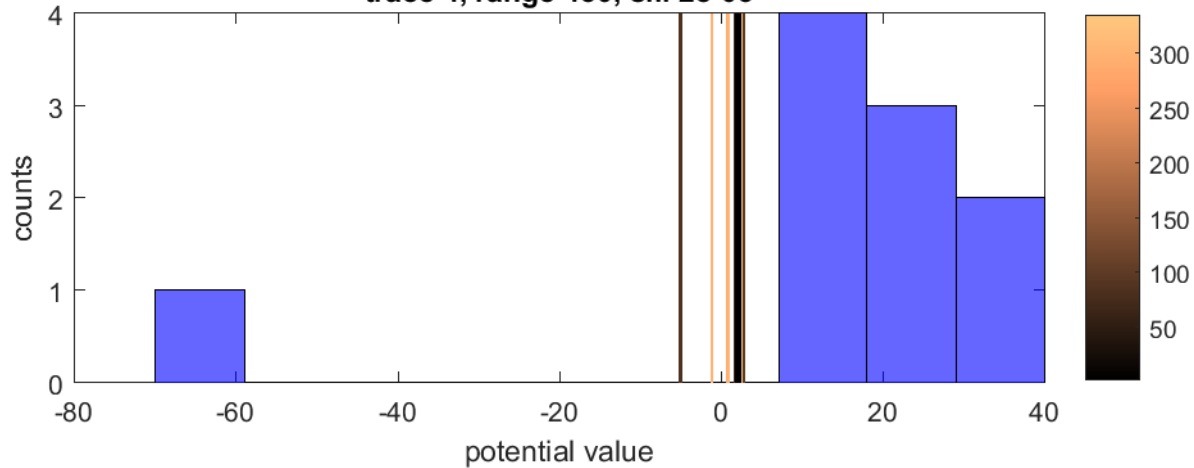

trace 5, range 450, sill 2e-03

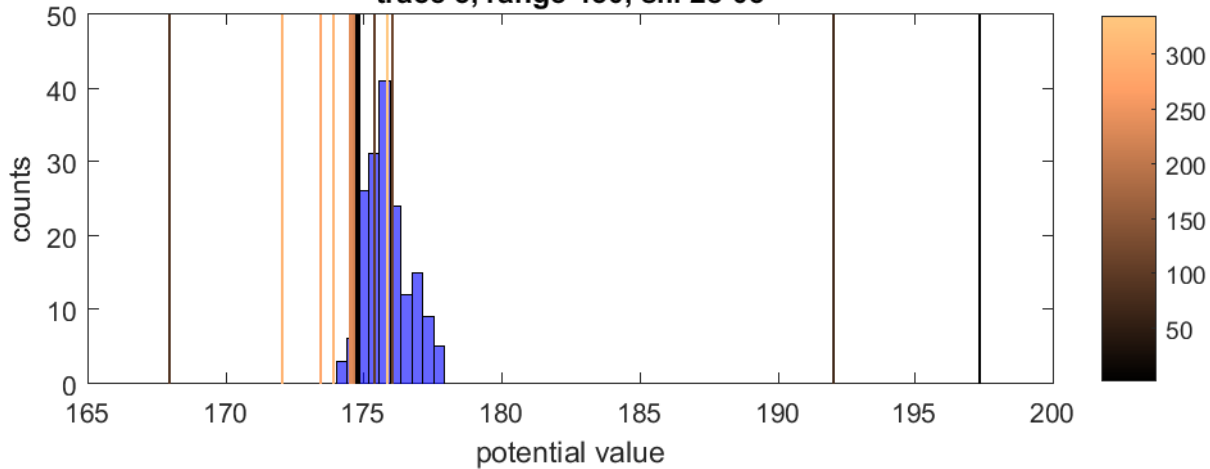



trace 6, range 450, sill 2e-03

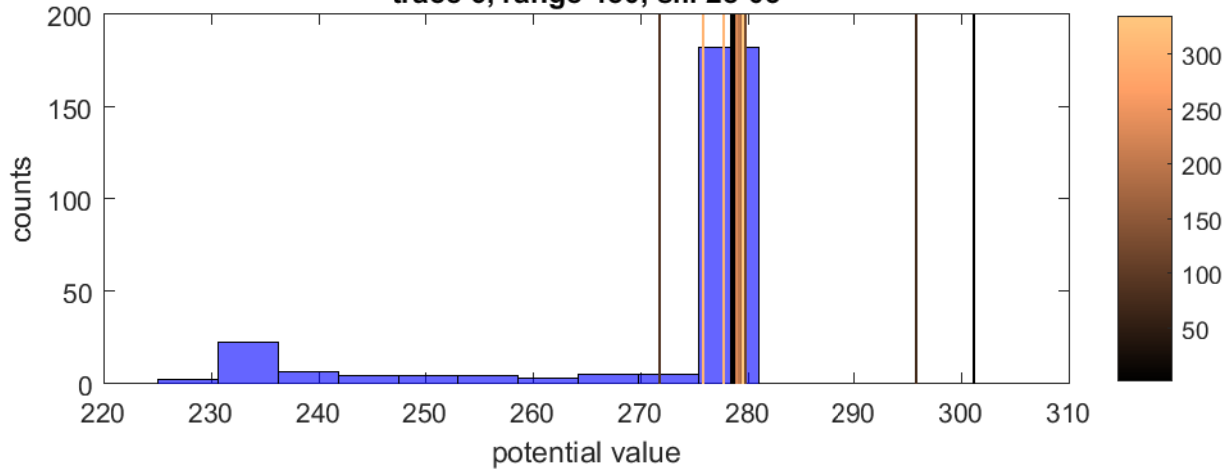

trace 7, range 450, sill 2e-03

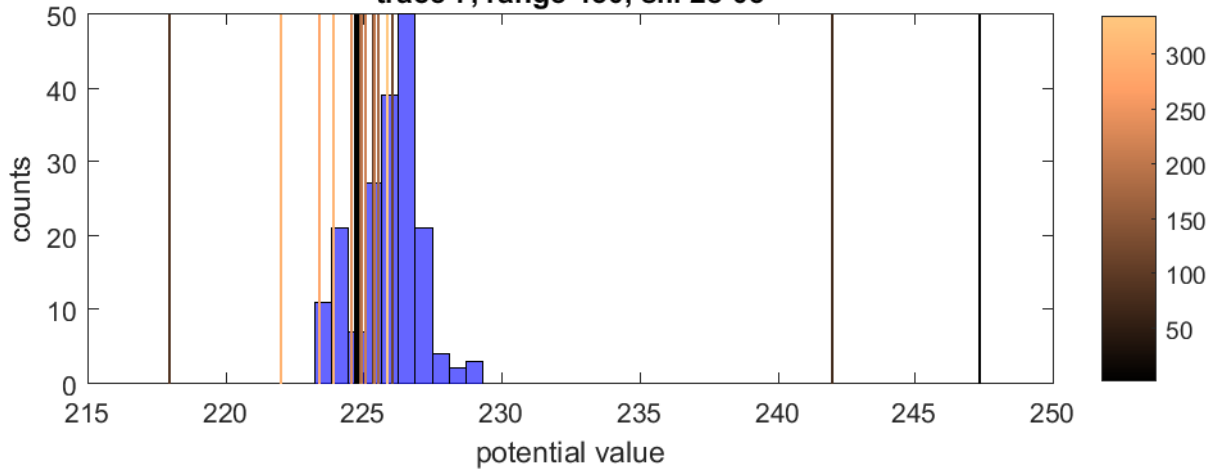



trace 8, range 450, sill 2e-03

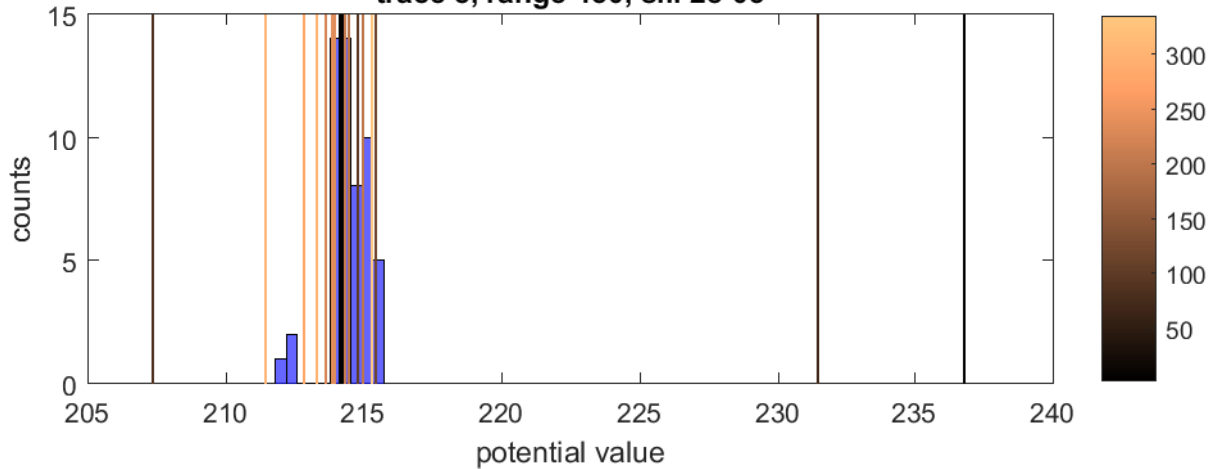

trace 9, range 450, sill 2e-03

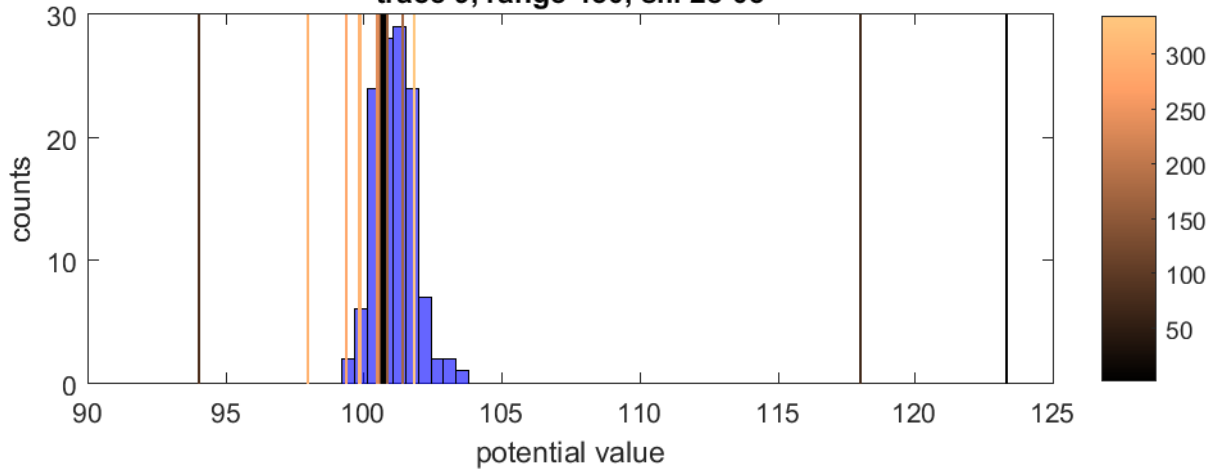

trace 10, range 450, sill 2e-03

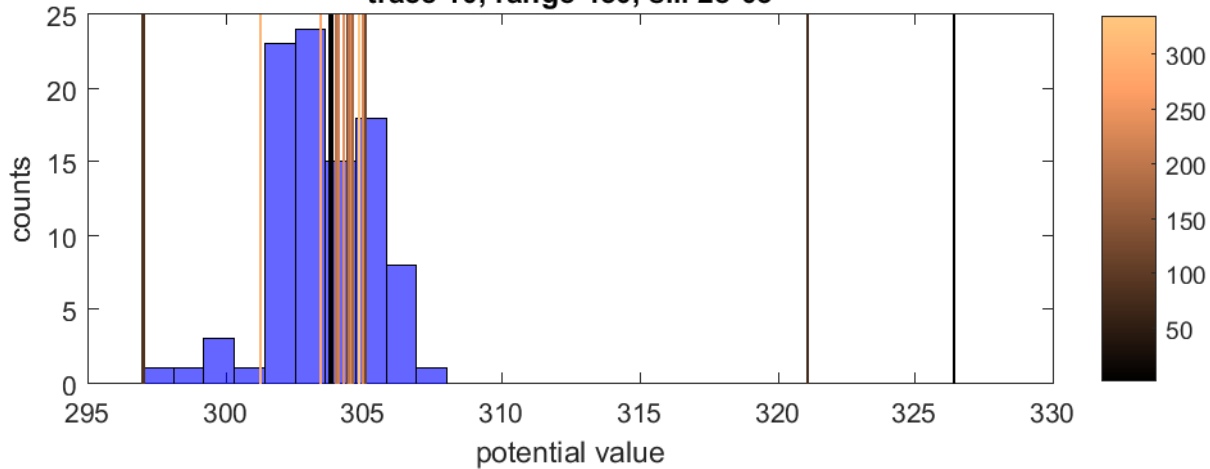

trace 11, range 450, sill 2e-03

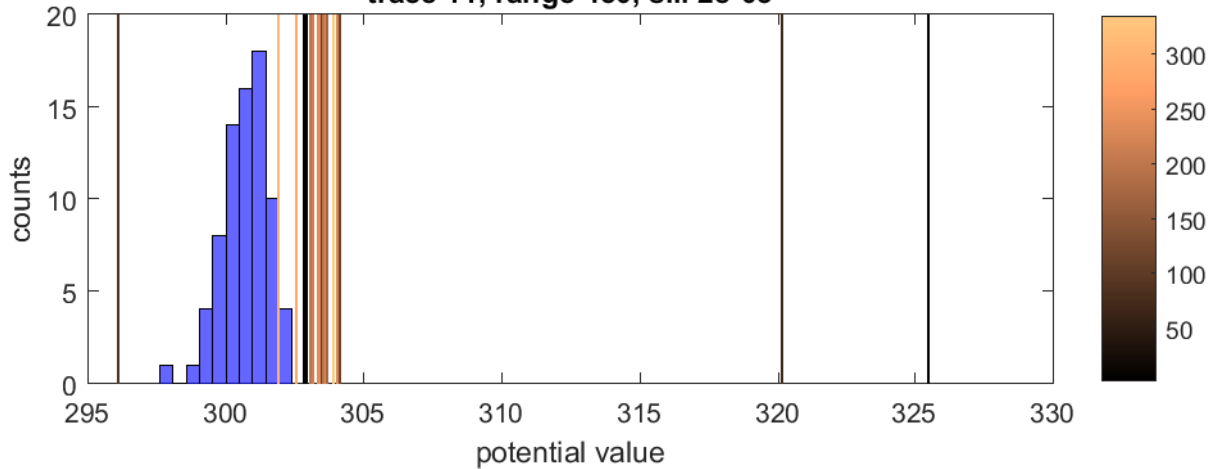

trace 12, range 450, sill 2e-03

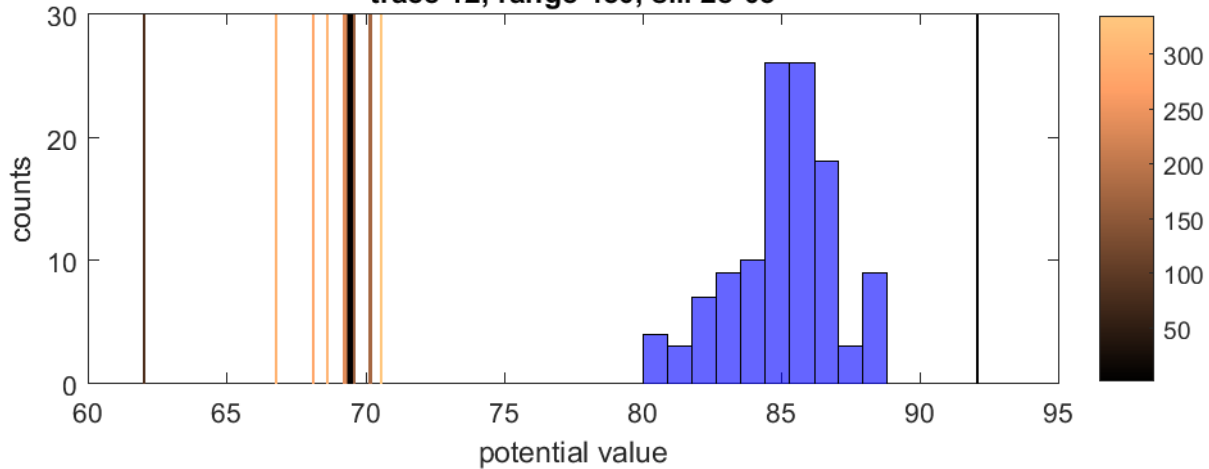

trace 13, range 450, sill 2e-03

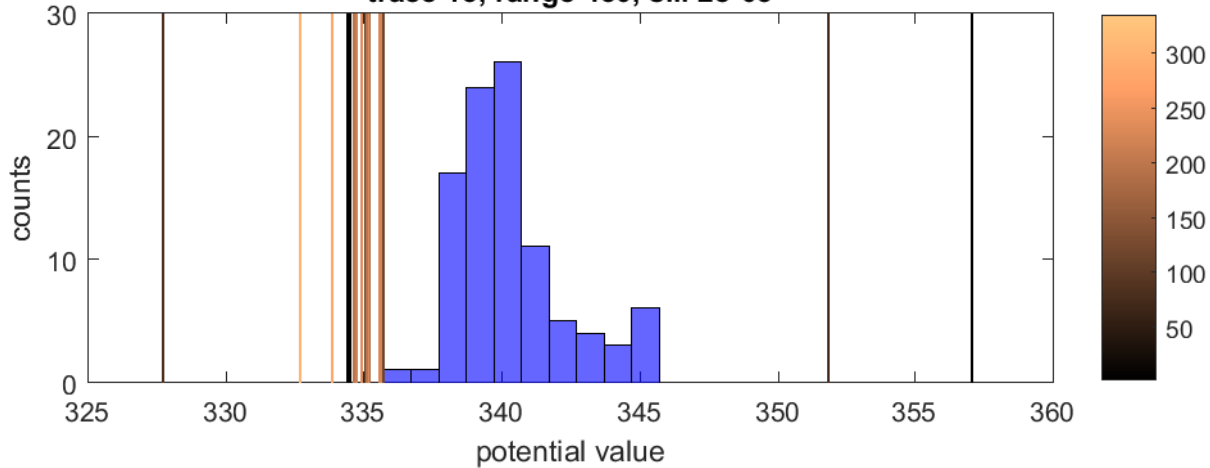

trace 14, range 450, sill 2e-03

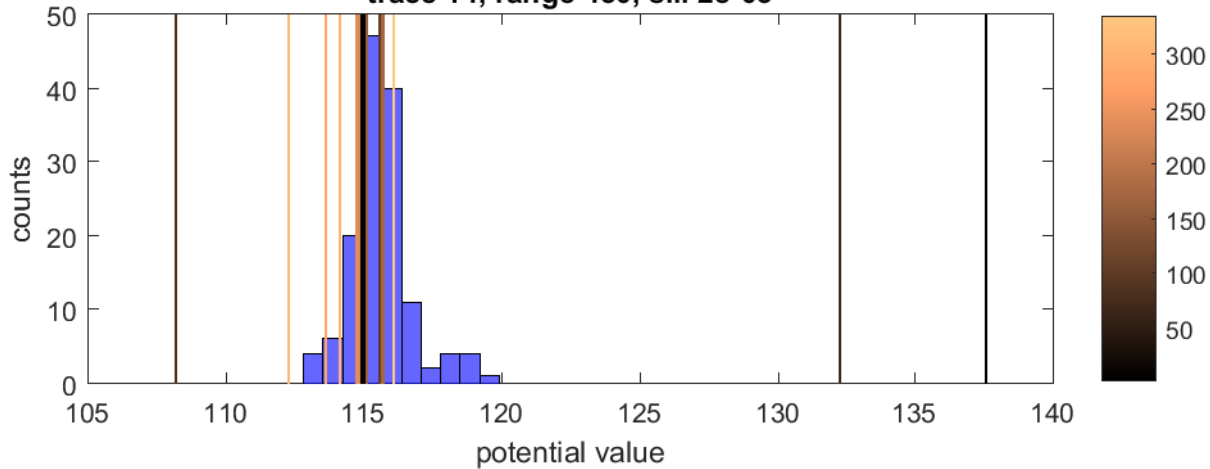



trace 15, range 450, sill 2e-03

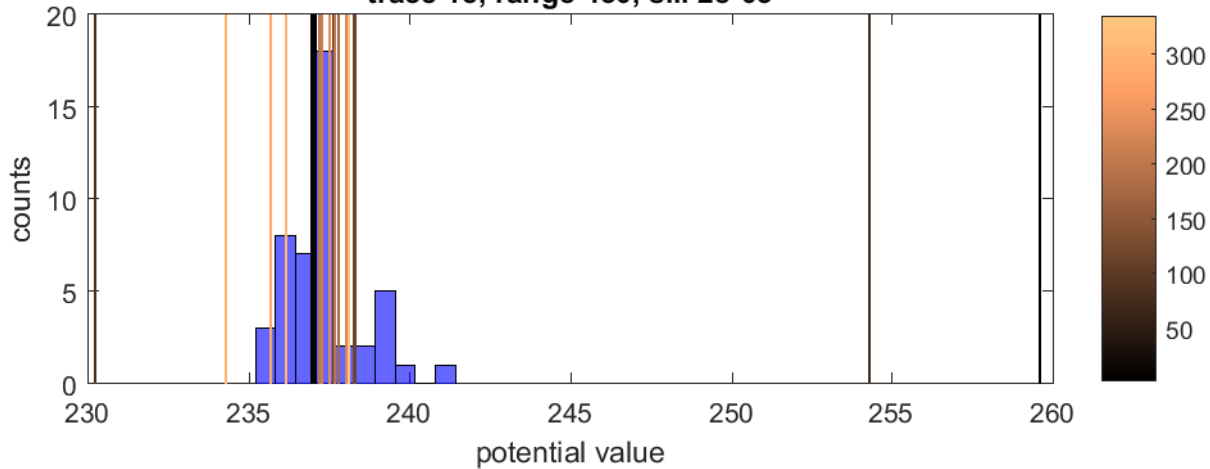

trace 16, range 450, sill 2e-03

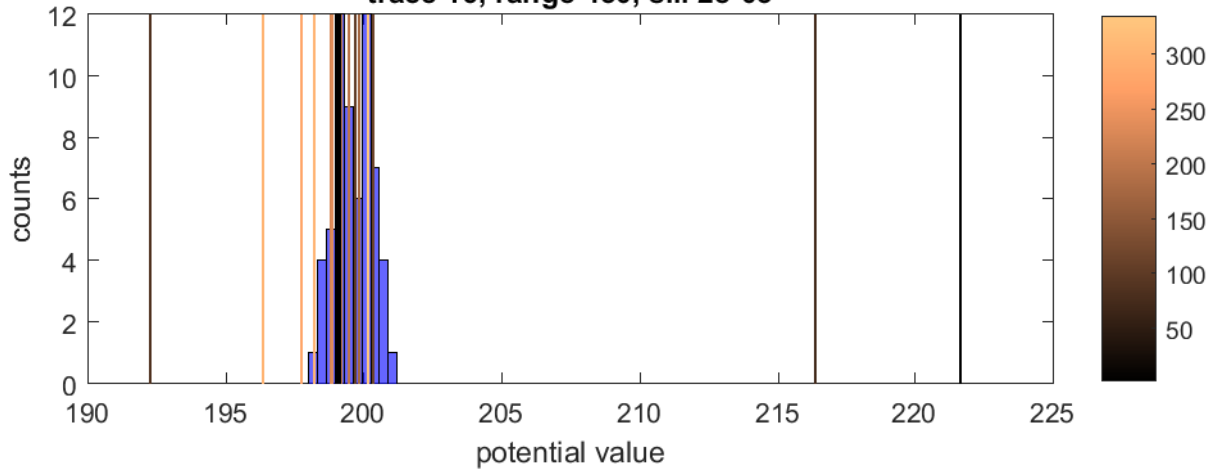

trace 17, range 450, sill 2e-03

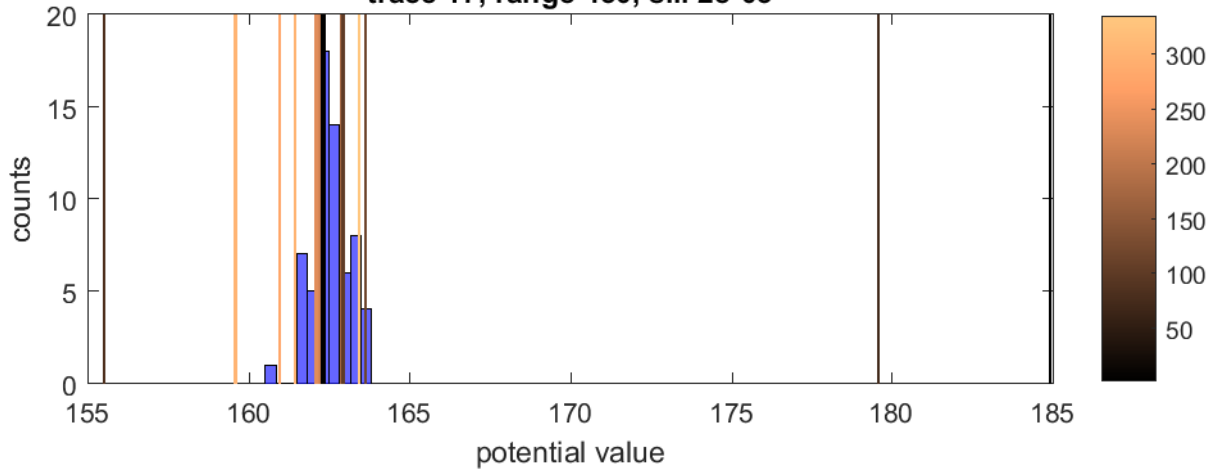

trace 18, range 450, sill 2e-03

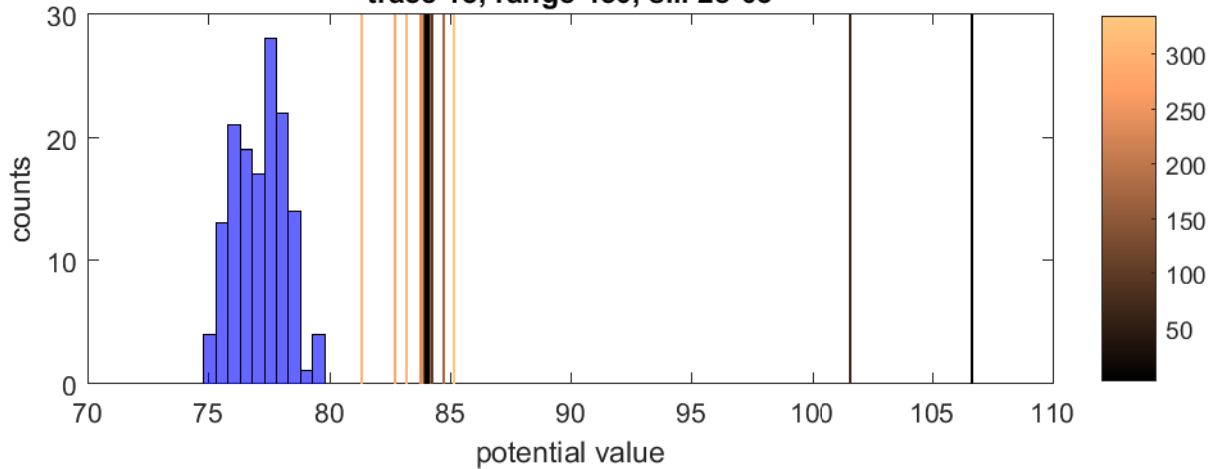

trace 19, range 450, sill 2e-03

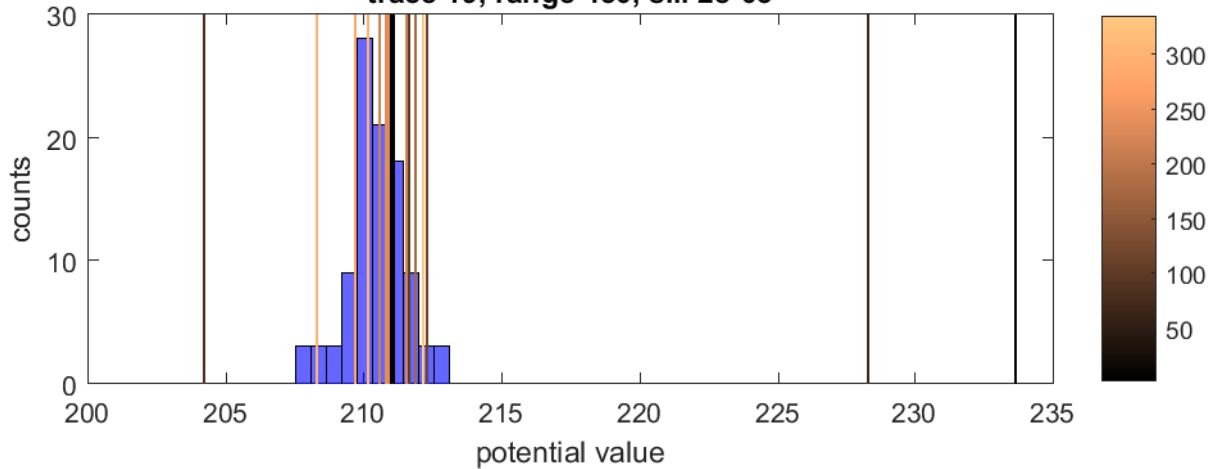

trace 20, range 450, sill 2e-03

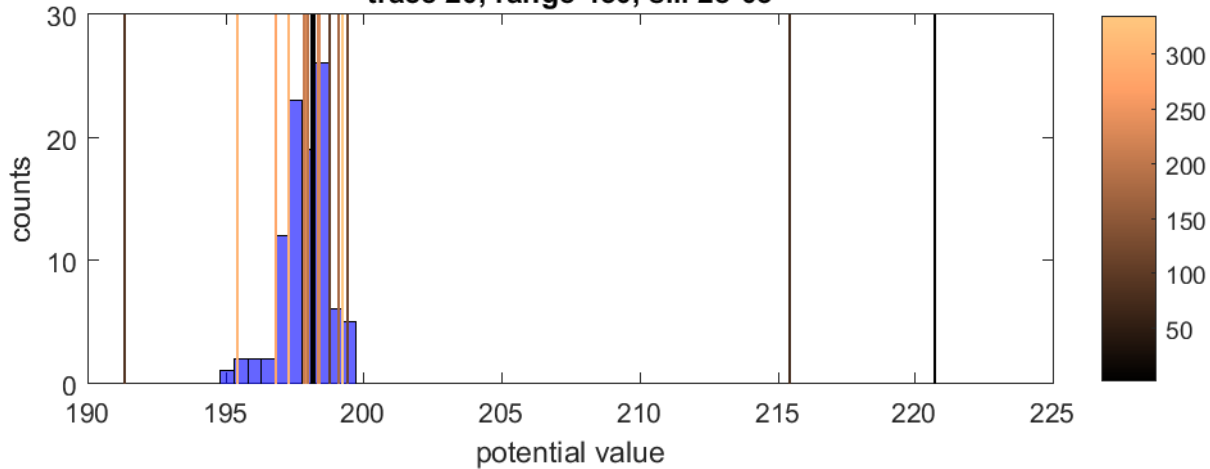

Supplement: Supplementary file 2 [file 1]
