# Supplementary material
Source: publisher figshare collection journal article supplement (https://gsapubs.figshare.com/articles/dataset/_/12542402)

# Ichilula RGB, 70.3 - 68.6 Ma

PSD

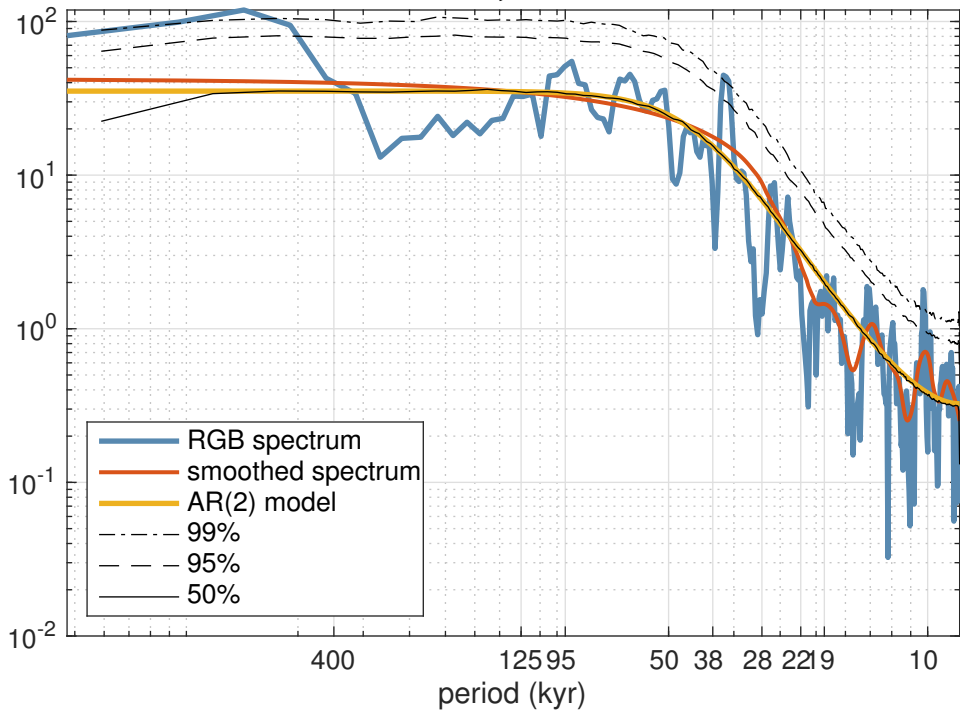

# Ichilula RGB, 72.0 - 70.2 Ma

PSD

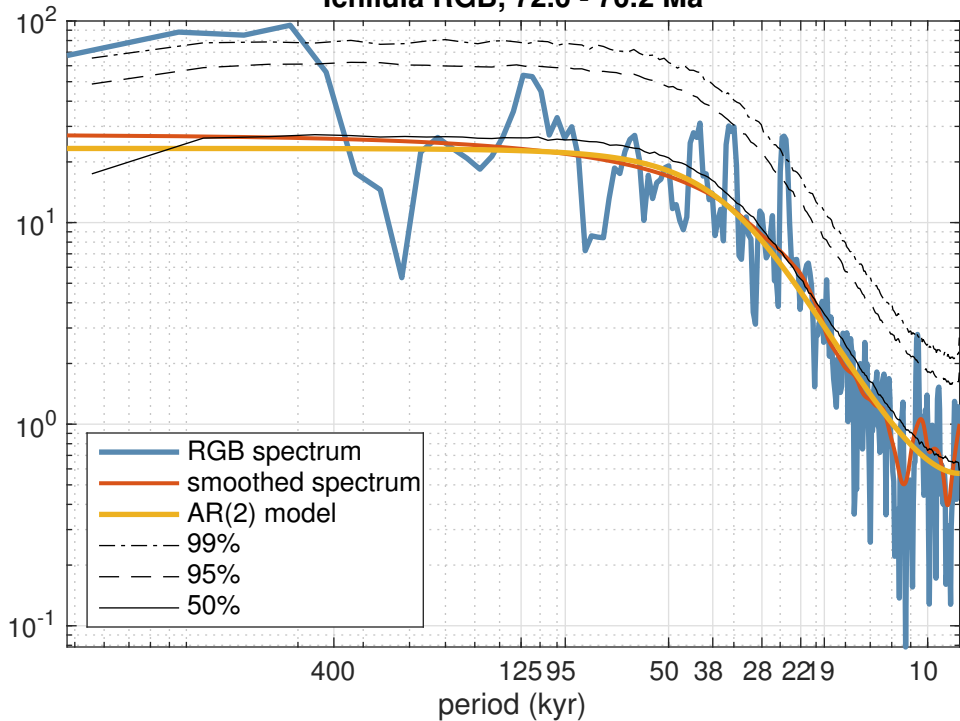

**Maragua RGB, 67.2 - 65.6 Ma**

PSD

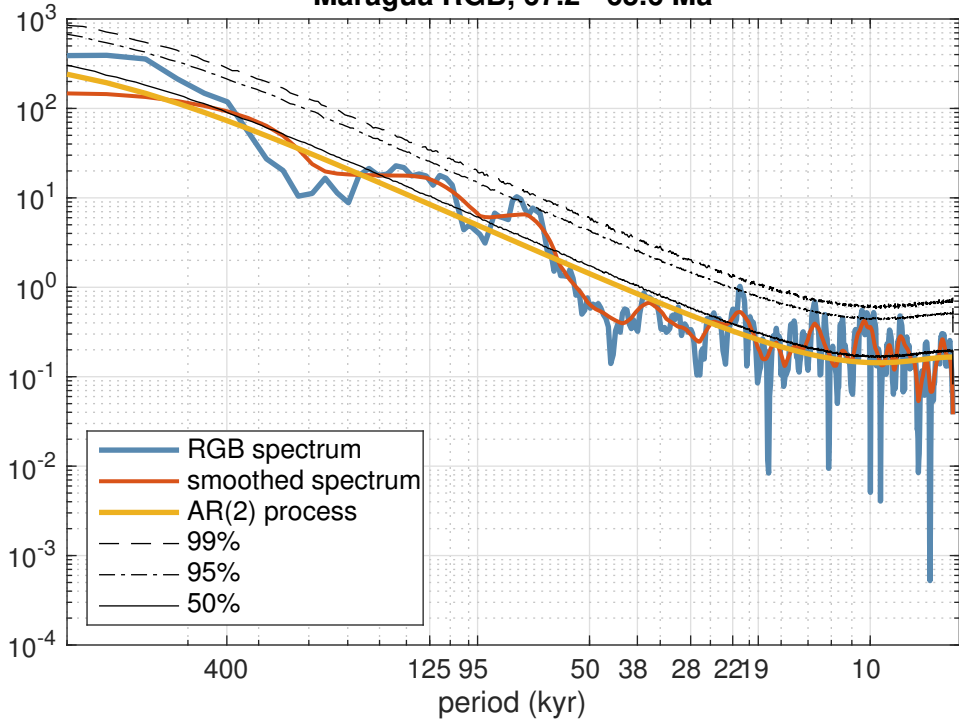

## Maragua RGB, 70.4 - 69.3 Ma

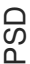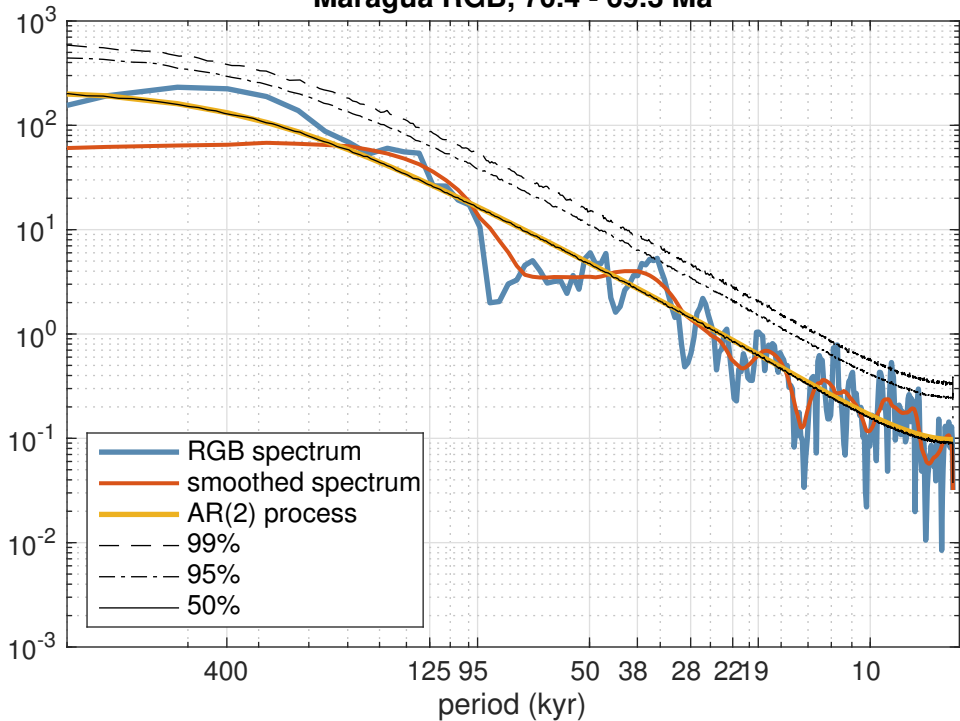

# Maragua RGB, 71.6 - 70.3 Ma

PSD

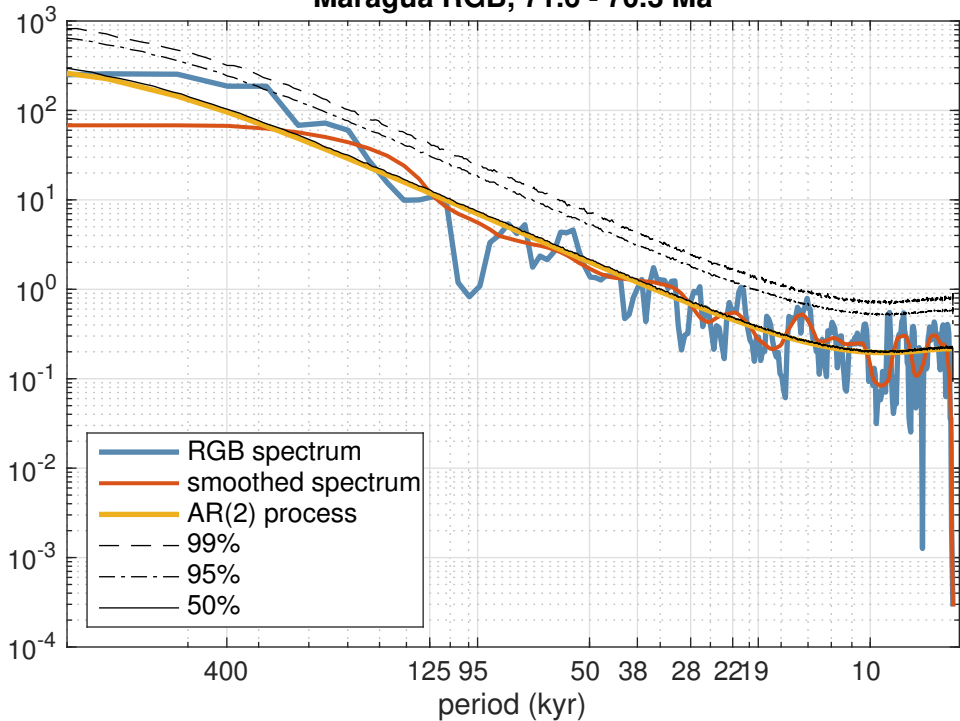

Supplement: Supplementary file 3 [file 1]
